# Supplementary material
Source: PubMed Central journal article supplement (PMC4282574)
Supplement: embj0033-2659-sd13.pdf [file embj0033-2659-sd13.pdf]

1 1/2

1 1/2

1 1/2

1 1/2

1 1/2

1 1/2

1 1/2

1 1/2
