# Supplementary material
Source: PubMed Central journal article supplement (PMC4282574)

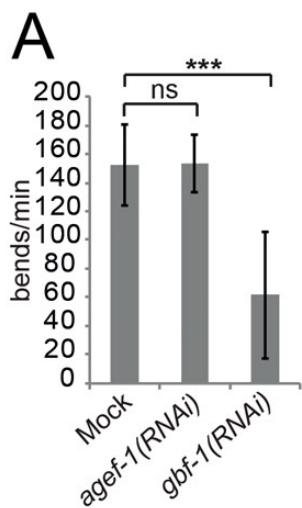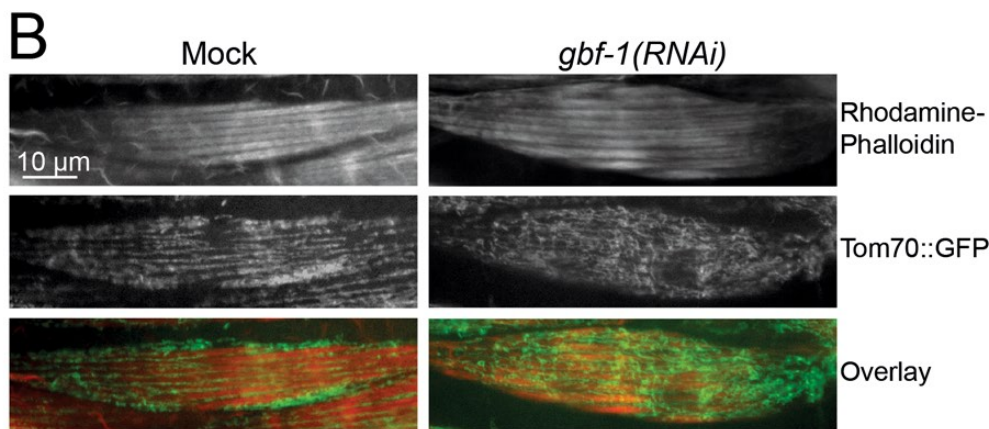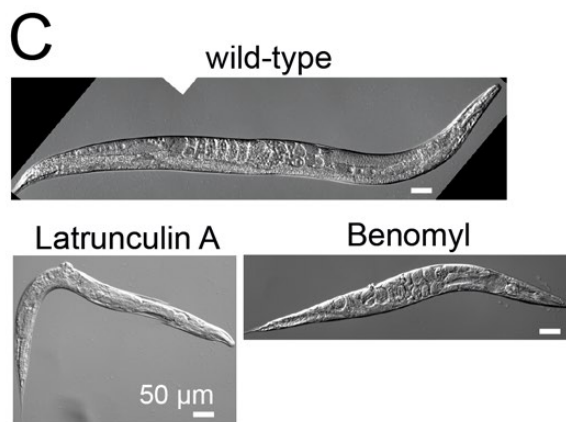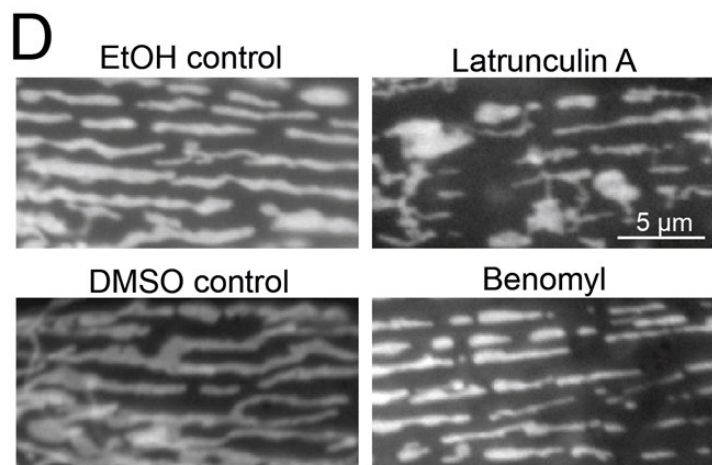

Supplement: embj0033-2659-sd1.pdf [file embj0033-2659-sd1.pdf]

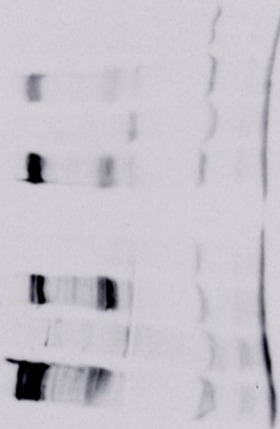

Supplement: embj0033-2659-sd12.pdf [file embj0033-2659-sd12.pdf]

Figure S2, Ackema et al.

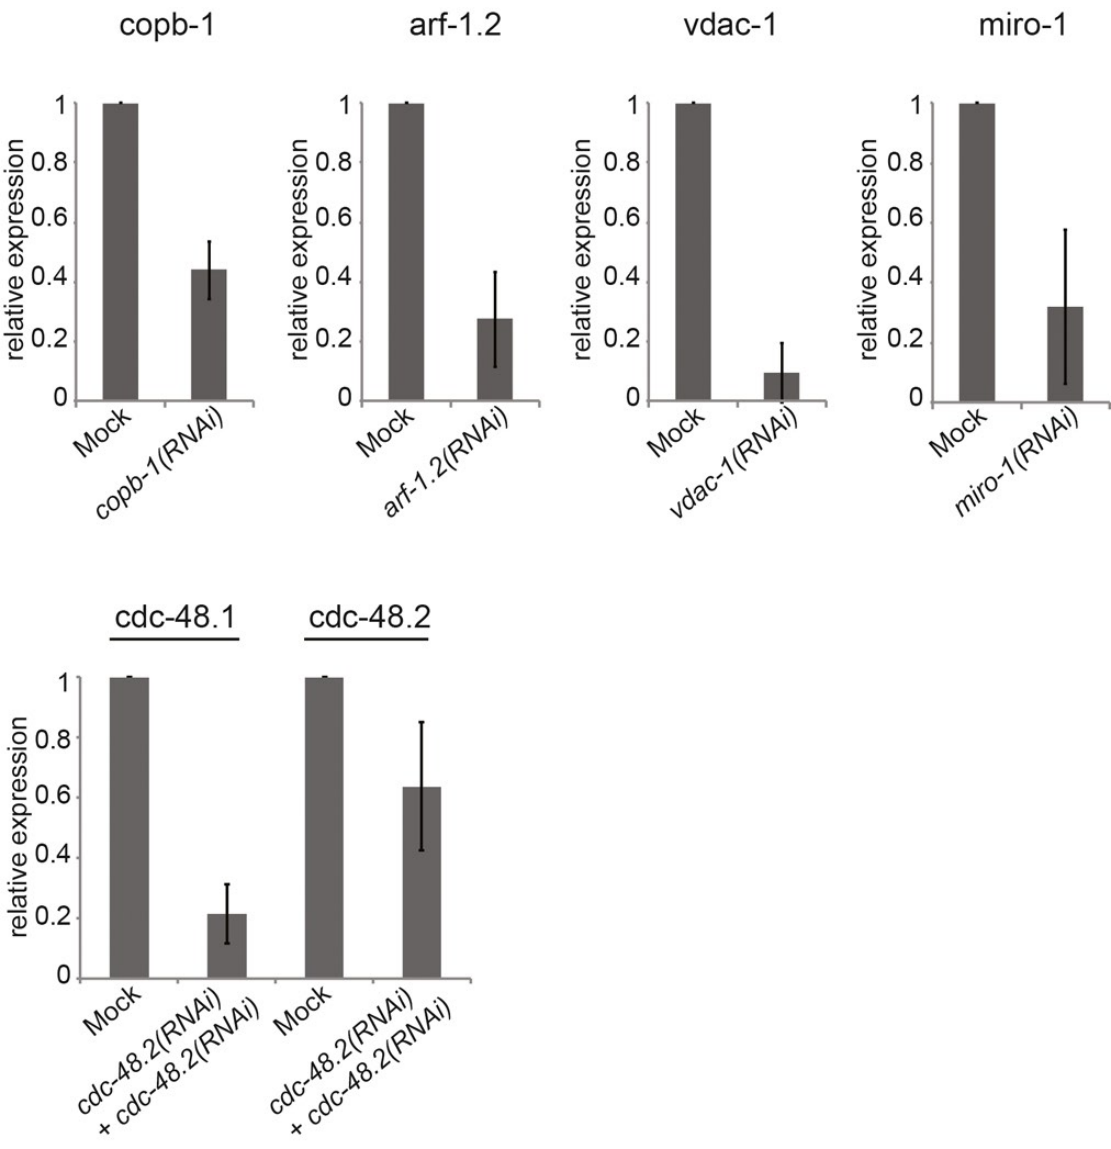

Supplement: embj0033-2659-sd2.pdf [file embj0033-2659-sd2.pdf]

**A**

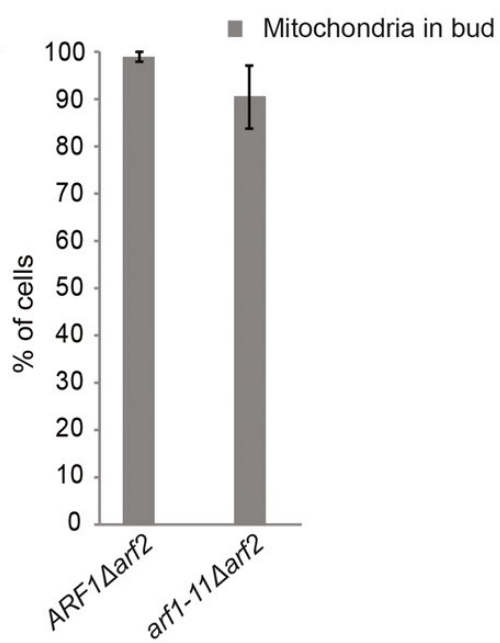

**B**

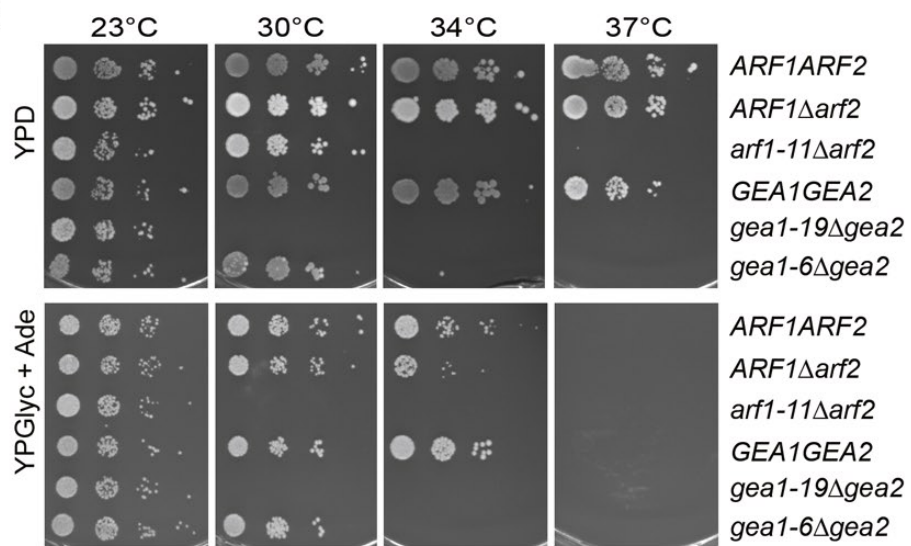

**C**

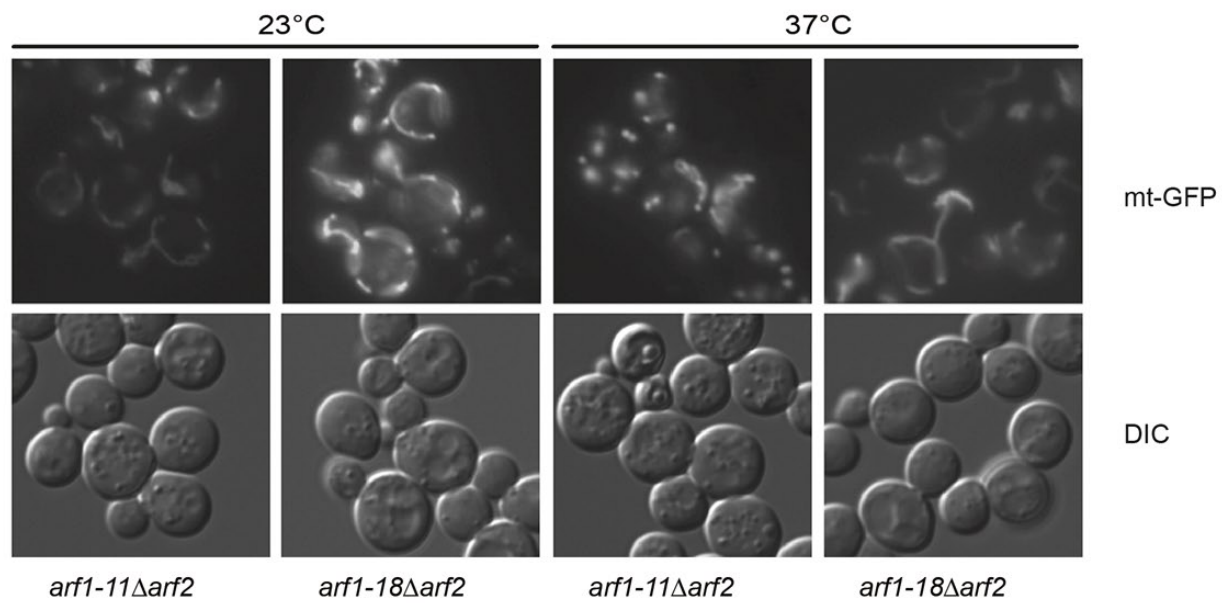

**D**

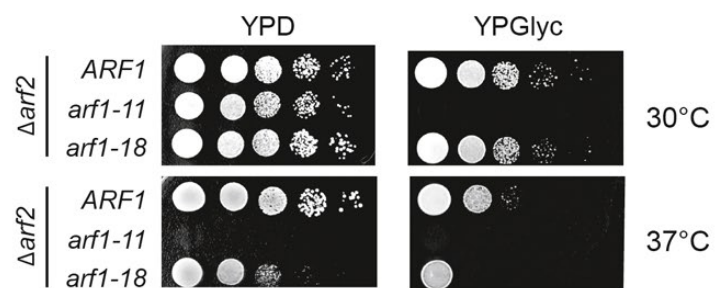

Supplement: embj0033-2659-sd3.pdf [file embj0033-2659-sd3.pdf]

Figure S4, Ackema et al.

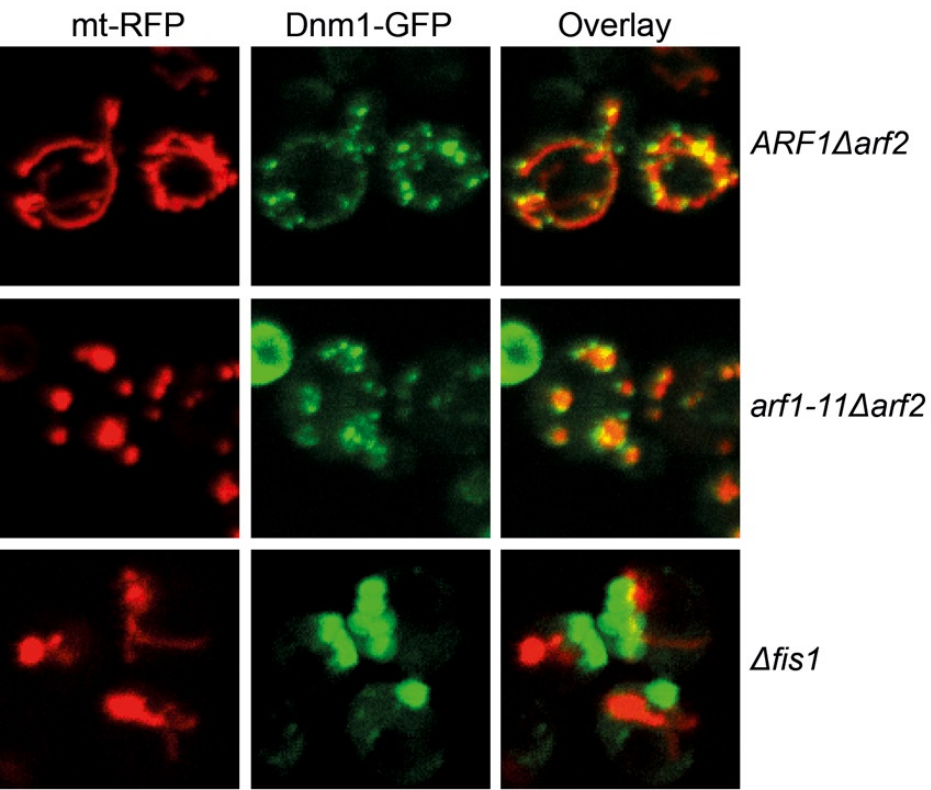

Supplement: embj0033-2659-sd4.pdf [file embj0033-2659-sd4.pdf]

Figure S5, Ackema et al.

**A**

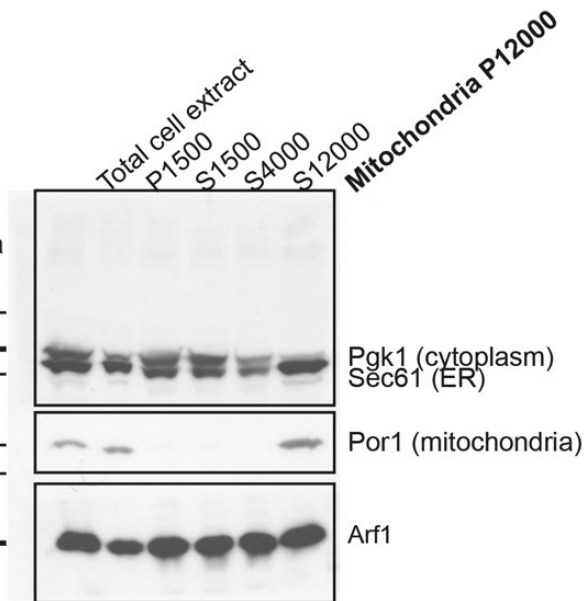

**B**

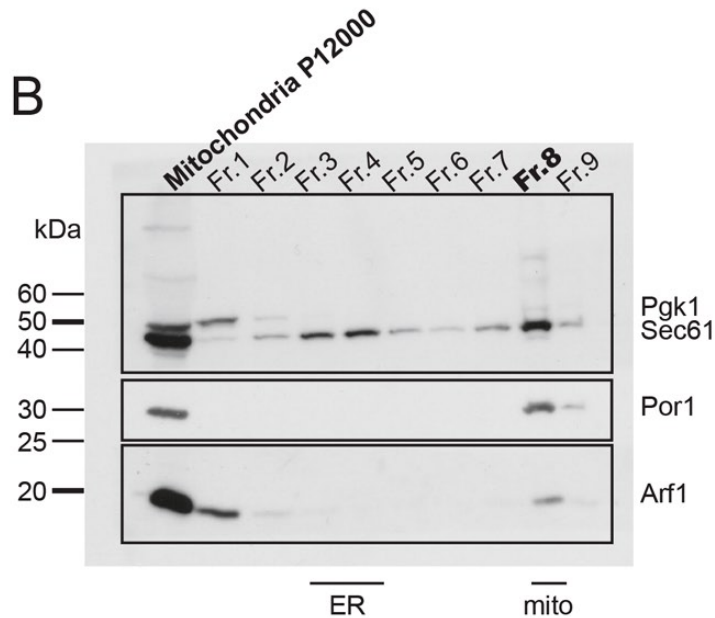

Supplement: embj0033-2659-sd5.pdf [file embj0033-2659-sd5.pdf]

A

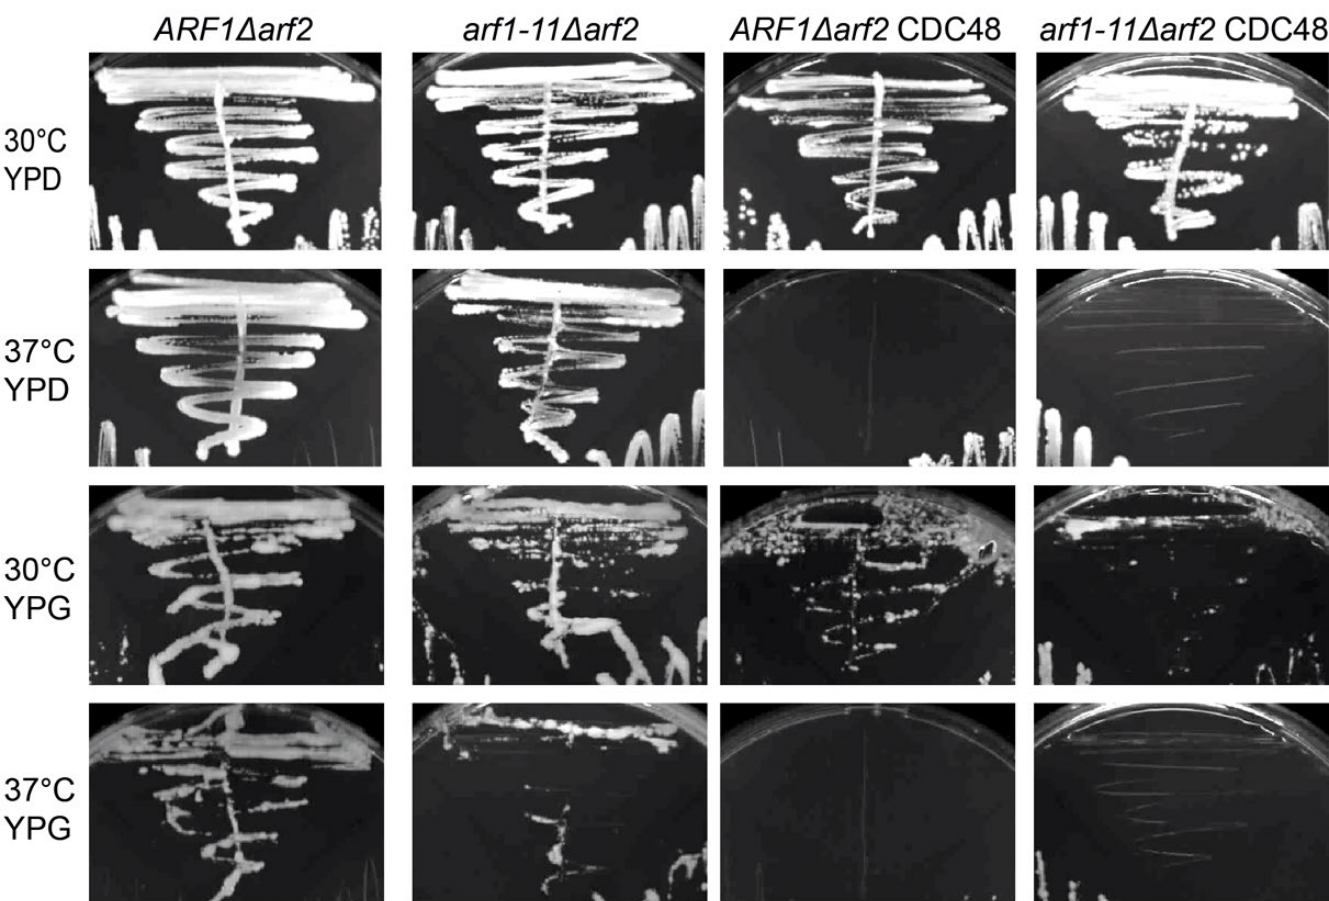

B

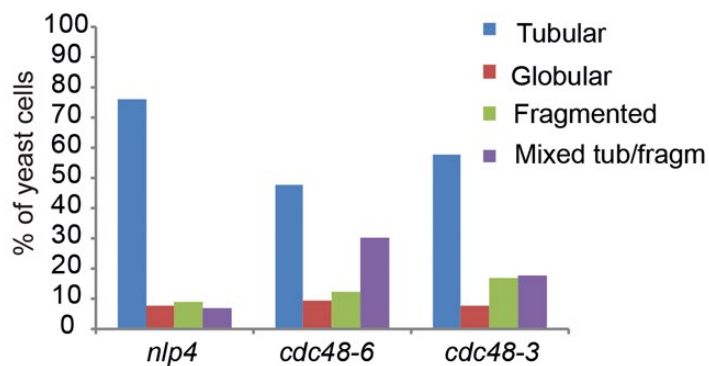

C

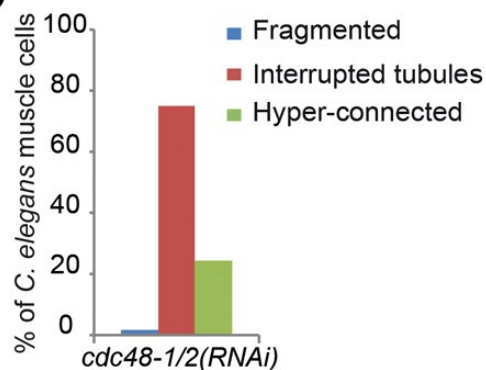

D

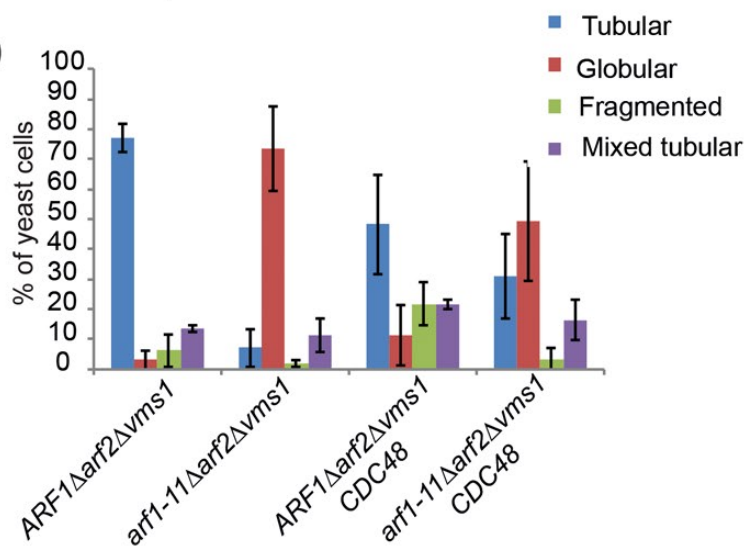

Supplement: embj0033-2659-sd6.pdf [file embj0033-2659-sd6.pdf]

**A**

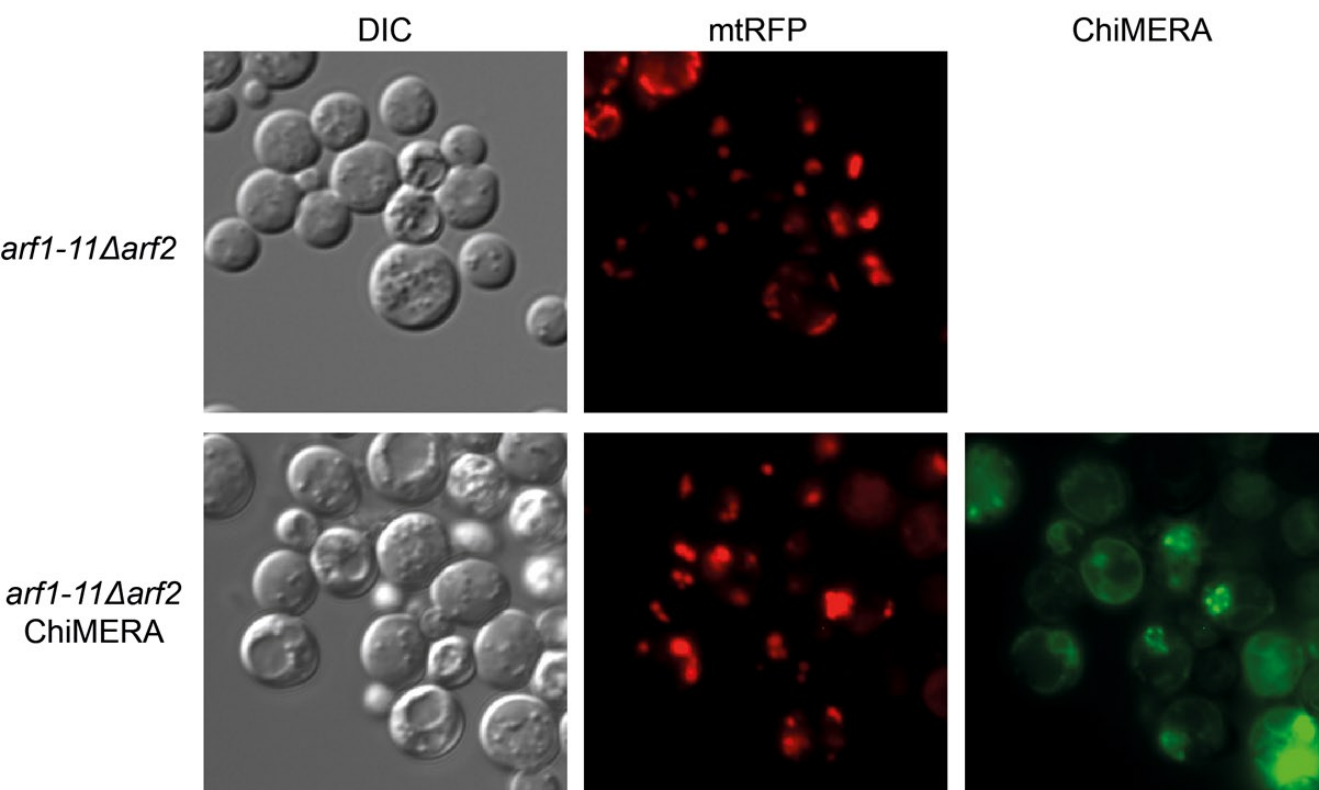

**B**

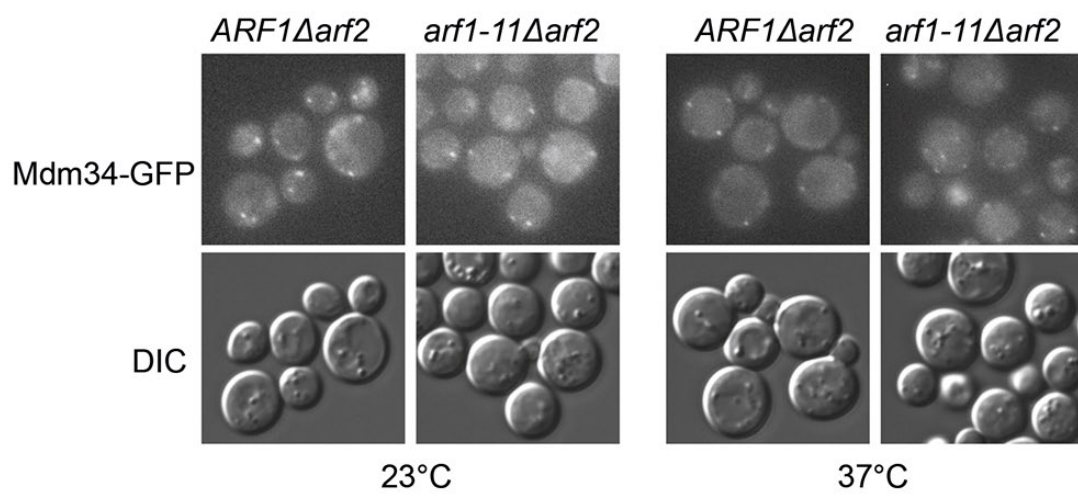

Supplement: embj0033-2659-sd7.pdf [file embj0033-2659-sd7.pdf]
